# Supplementary material for: ATP6AP1 deficiency causes an immunodeficiency with hepatopathy, cognitive impairment and abnormal protein glycosylation
Source: PubMed Central journal article supplement (PMC4894975; doi:10.1038/ncomms11600), 2016-05-27
Supplement: ncomms11600-s1.pdf [file ncomms11600-s1.pdf]

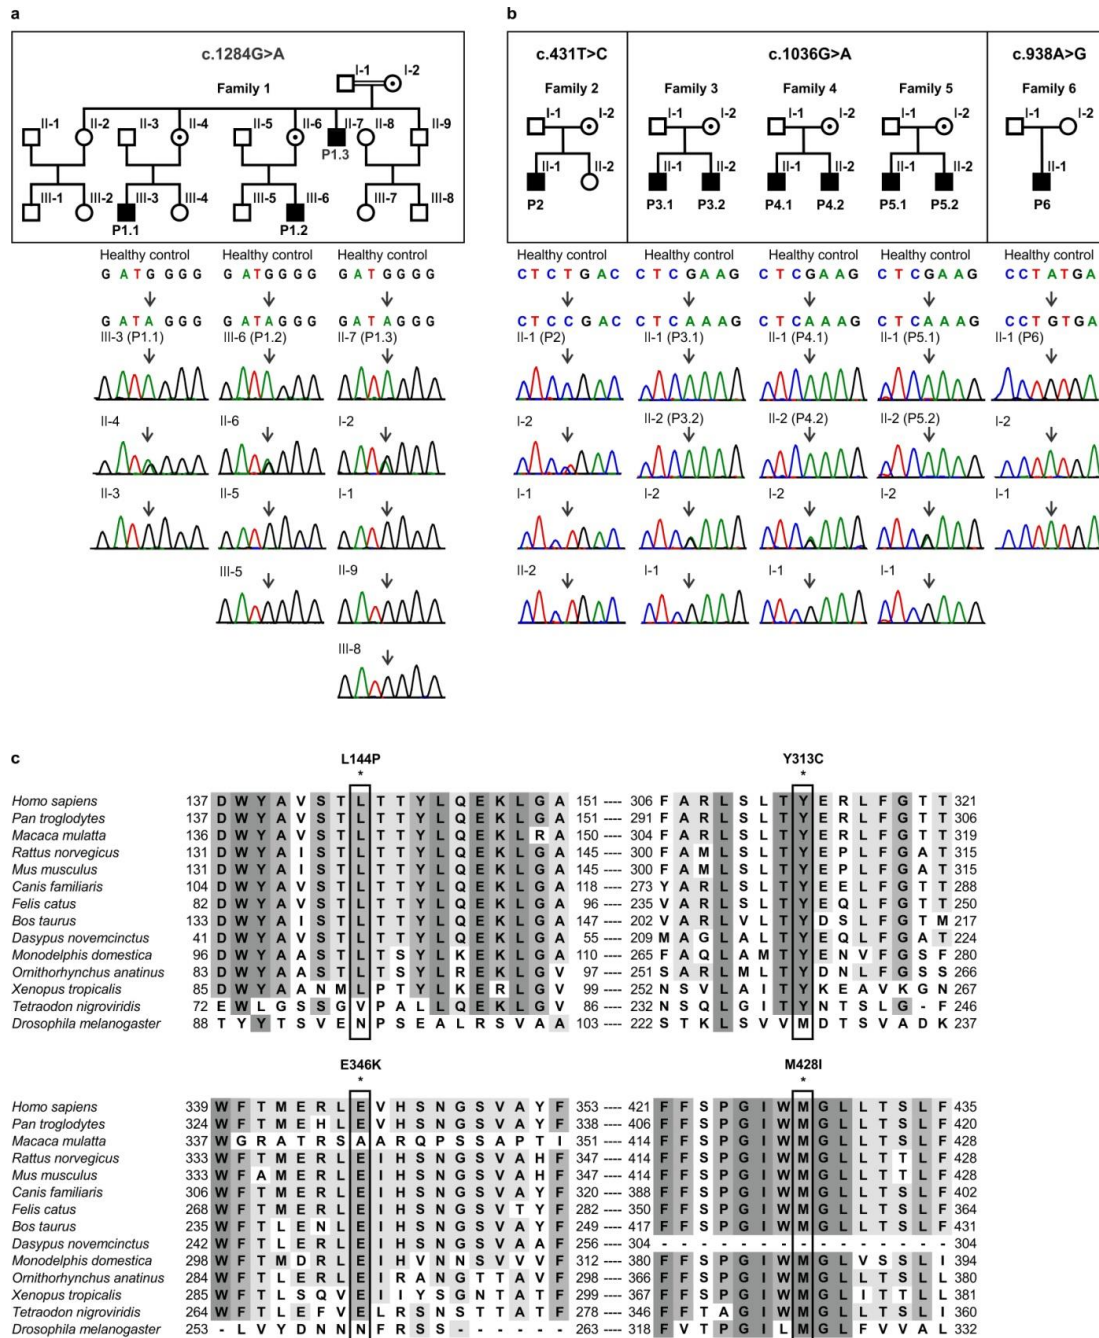

### Supplementary Fig. 1. *ATP6AP1* gene mutations in all families.

(a) Sequence profiles show the 1284G>A change in patients P1.1, P1.2 and P1.3. Subjects II-4, II-6 and I-2 are the mothers of the patients who carry the mutation in heterozygous state. Fathers (subjects I-1, II-3, II-5, and II-9) do not carry the mutation and are hemizygous wild type. Individuals III-8 and III-5 were also sequenced and were hemizygous wildtype. DNA of individuals II-1, II-2, III-1, and III-2 was not available for sequencing. (b) *ATP6AP1* gene mutations in families 2-6. Mutation c.431T>C in family 2 is only found in hemizygous state in patient P2, and in heterozygous state in the mother, indicated as I-2. The c.1036A>G mutation is found in heterozygous state in all mothers of families 3-5. Mutation c.938A>G is only found in patient 6, and not in the parents. The *de novo* nature was confirmed by STR marker analysis (data not shown). In all families, fathers are hemizygous wild type. (c)

Conservation is shown of the substituted amino acids of Ac45 as found in families 1-6. Substituted amino acids are indicated with an asterisk (\*).

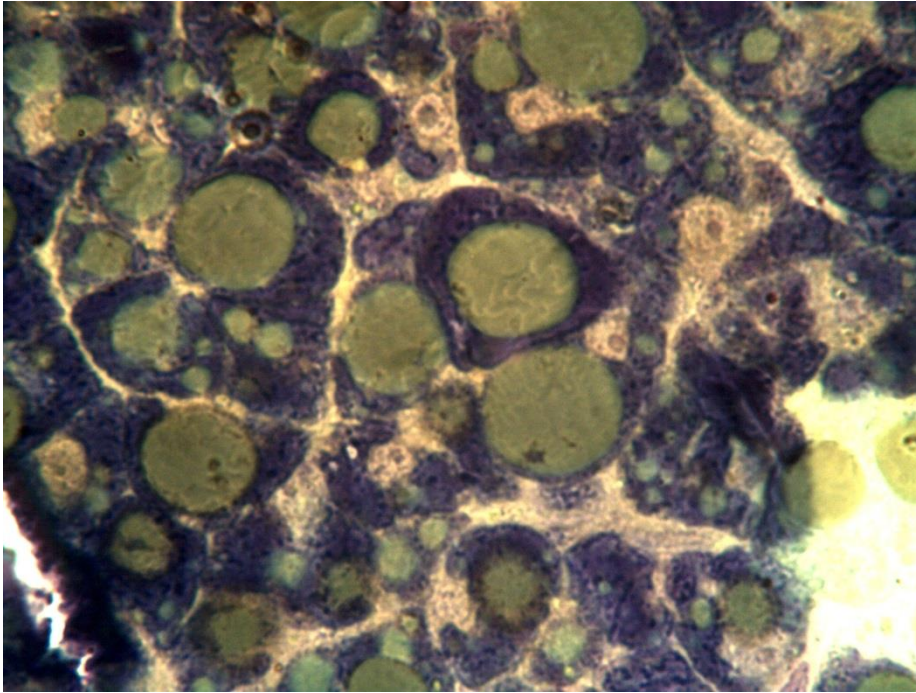

**Supplementary Fig. 2. Liver biopsy of patient 3.1**

Light microscopy reveals severe steatosis of hepatocytes. Shown is a toluidine blue stain, x 1,000.

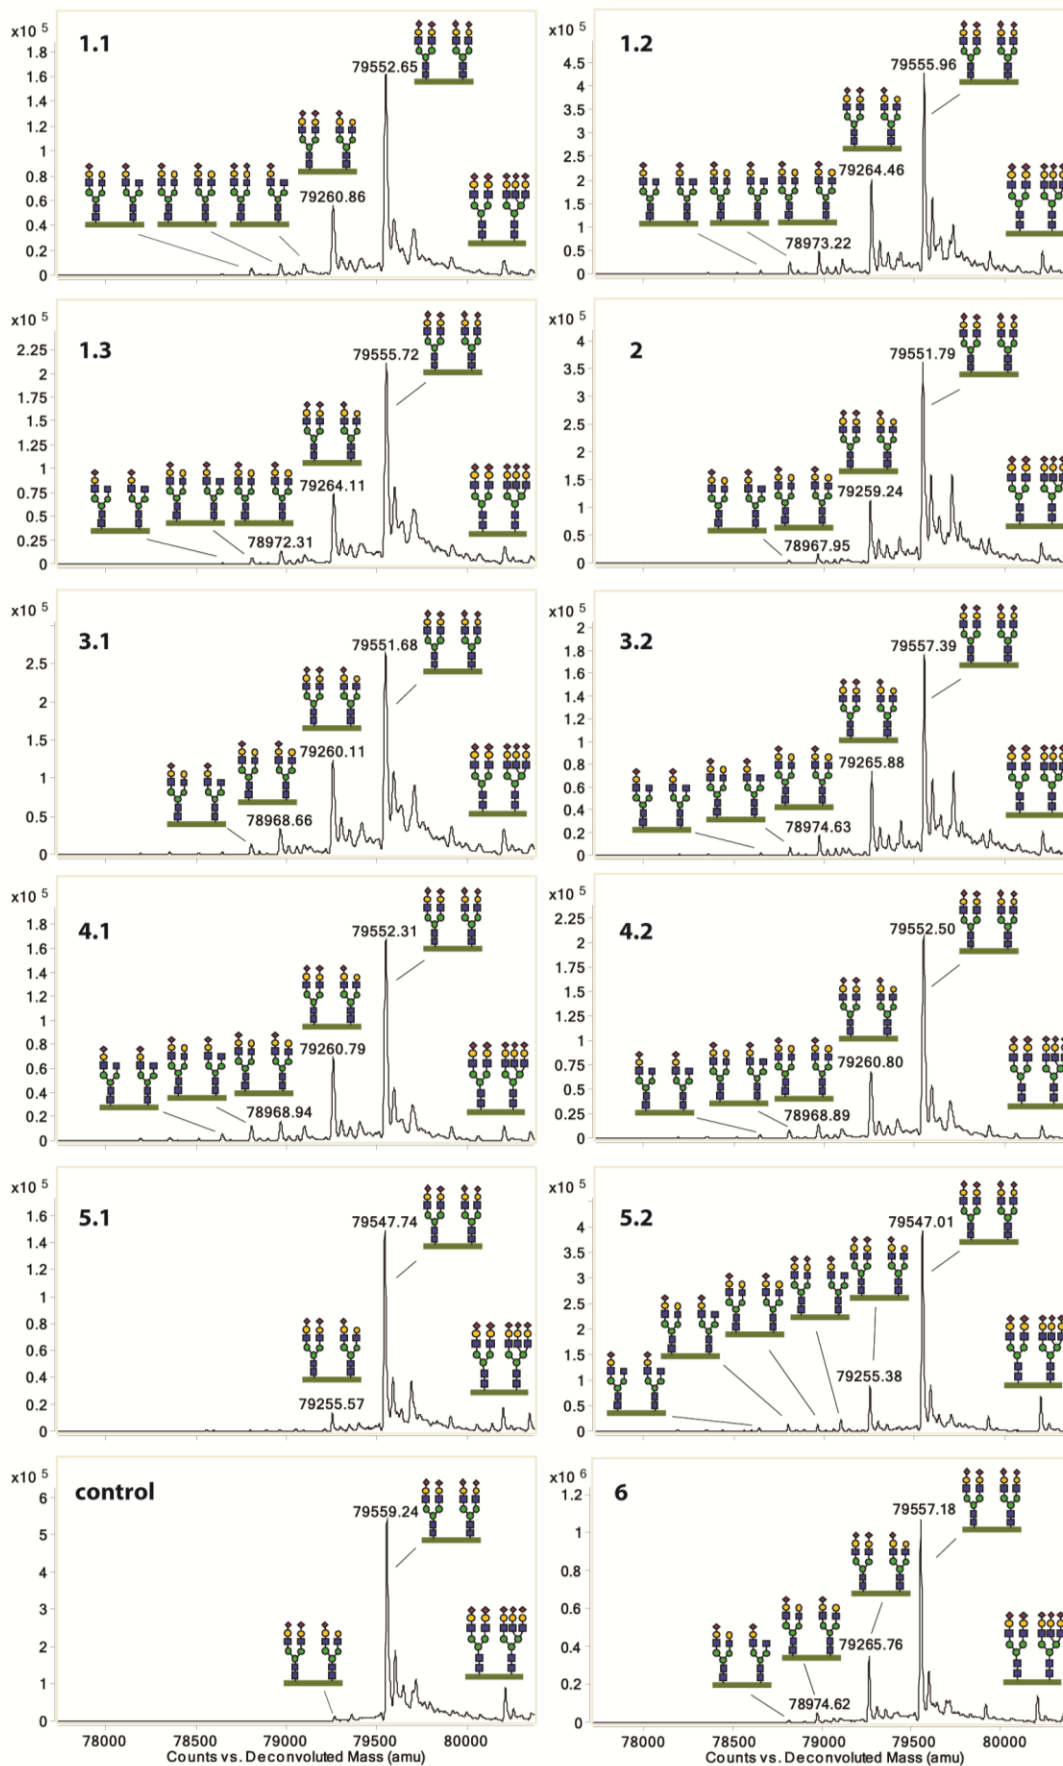

**Supplementary Fig. 3. High resolution mass spectra of intact serum transferrin of all patients**

Similar peaks of truncated structures lacking galactose and sialic acids were observed for all patients, although in variable intensity.

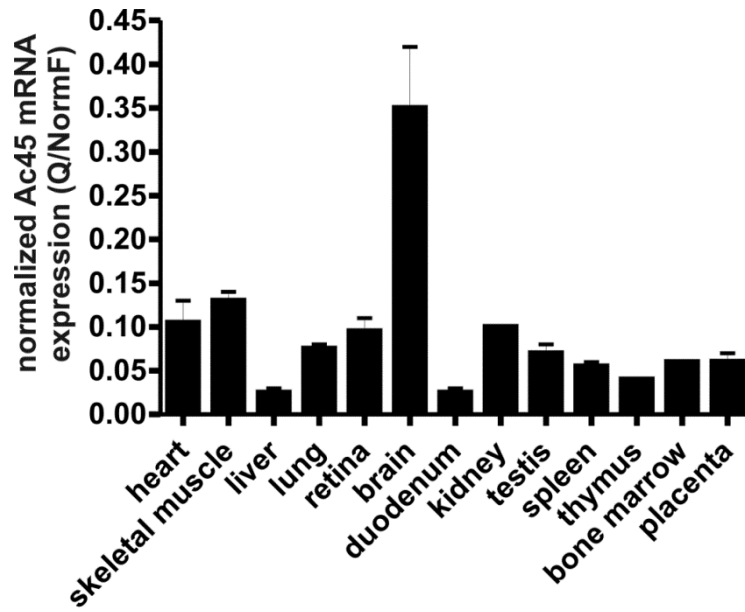

**Supplementary Fig. 4. Analysis of Ac45 mRNA expression levels in different human adult tissues**

qPCR quantifications were performed on the equivalent of 12.5 ng total RNA. Primers used are listed in Supplementary **Table 4**. As reference transcripts, *GUSB* and *PPIB* were used. qPCR data were analyzed by using comparative quantitation and the relative Q-values of the genes of interest calculated by equalizing the lowest Ct value to 1. The normalization factor (NormF) for the reference genes was determined using the GeNORM program ([medgen.ugent.be/genorm](http://medgen.ugent.be/genorm)) and used to normalize the Q-values. Error bars represent S.E.M.

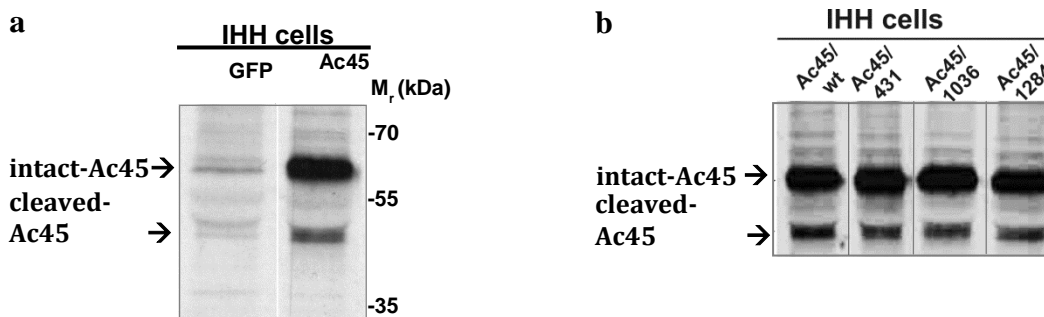

**Supplementary Fig. 5. Analysis of newly-synthesized human (mutant) Ac45 in human hepatocytes (IHH)**

**(a)** Cells were transfected with either GFP or Ac45 construct, pulsed for 30-min with  $^{35}\text{S}$ -methionine/cysteine, and Ac45 was immunoprecipitated using the anti-Ac45 antibody (see Experimental Procedures). Immunoprecipitates were resolved by 10% SDS-PAGE. **(b)** To study protein stability, mutant constructs of Ac45 (c.431T>C, c.1036G>A or c.1284G>A) were transfected in IHH cells and analysed after 30-min  $^{35}\text{S}$  labeling and immunoprecipitation of Ac45.



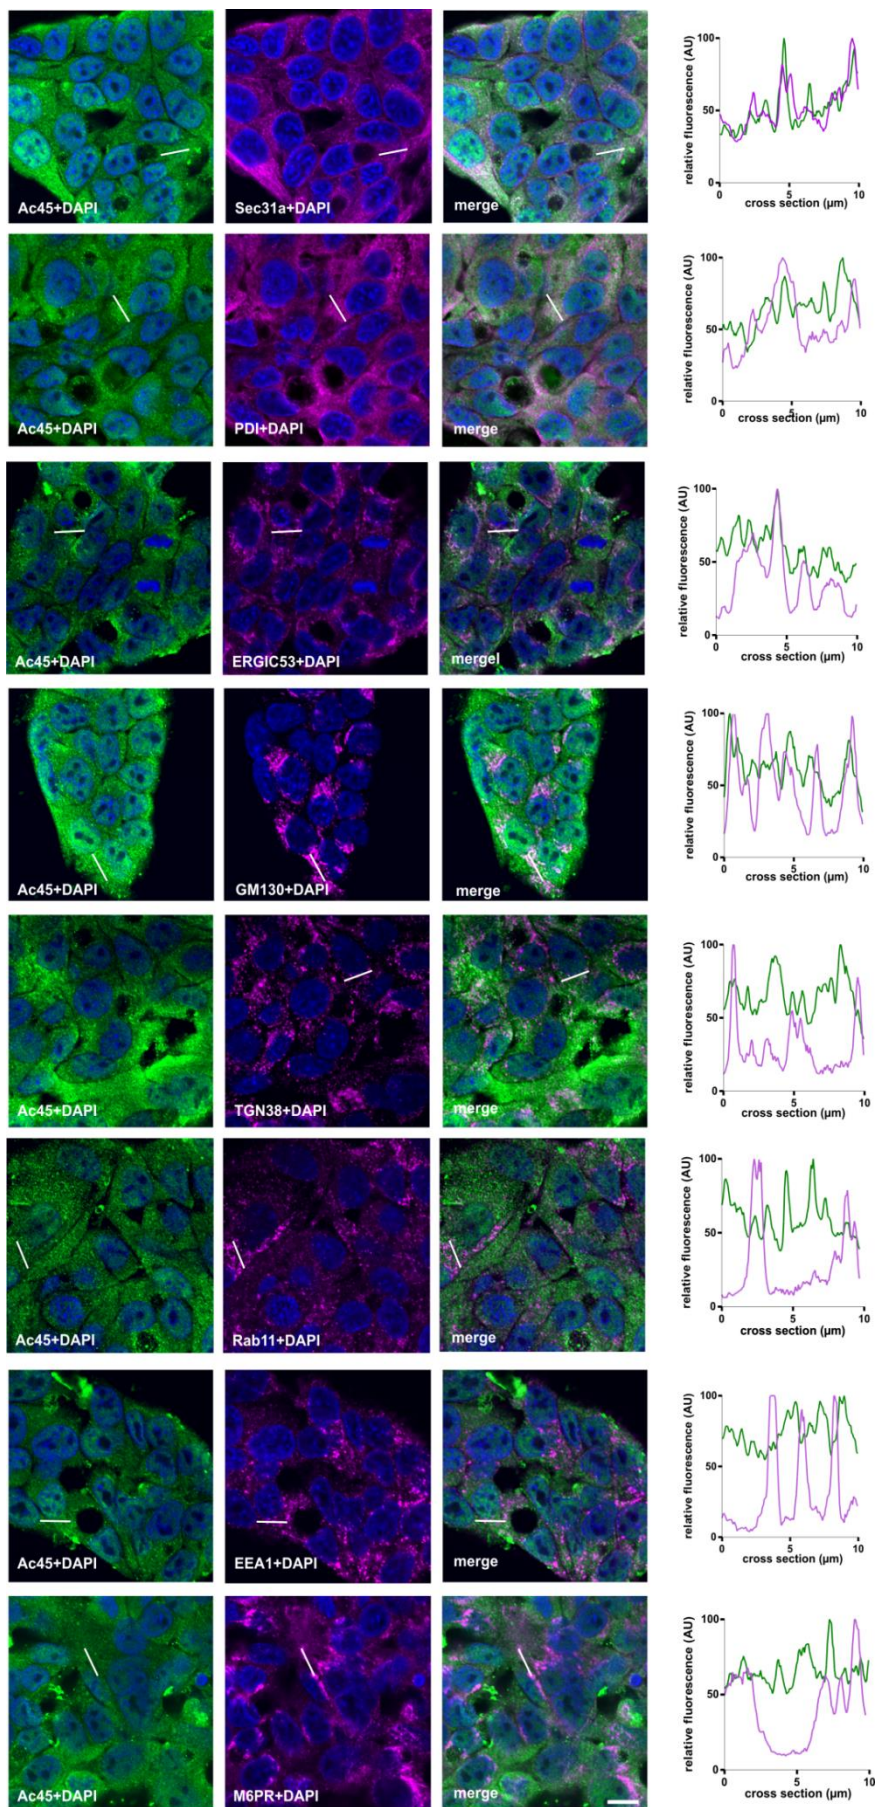

**Supplementary Fig. 6. Ac45 in IHH cells is mainly localized to the early secretory pathway**

IHH cells were stained with the anti-Ac45 antibody (green) together with antibodies against different organelle markers (magenta). Markers used included ER marker protein disulfide-isomerase (PDI), the COPII vesicle marker Sec31a, ER-Golgi intermediate compartment marker ERGIC-53, the Golgi matrix protein 130 (GM130), *trans*-Golgi network integral membrane protein 38 (TGN38), endocytic recycling compartment/TGN marker Rab11, early endosome antigen-1 (EEA1) and late endosomal marker Mannose-6-phosphate receptor (M6PR). A cross section of 10  $\mu\text{m}$  was used to measure the relative fluorescence of Ac45 and the respective marker. Bar = 10  $\mu\text{m}$

**A**

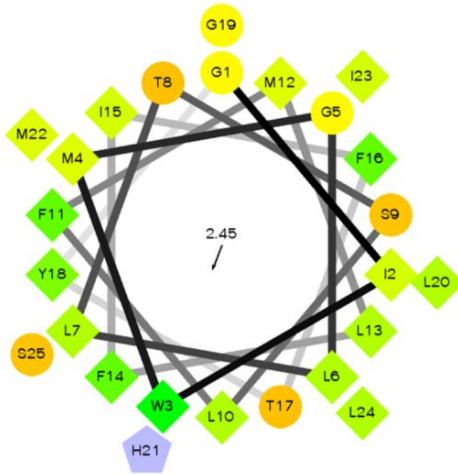

**B**

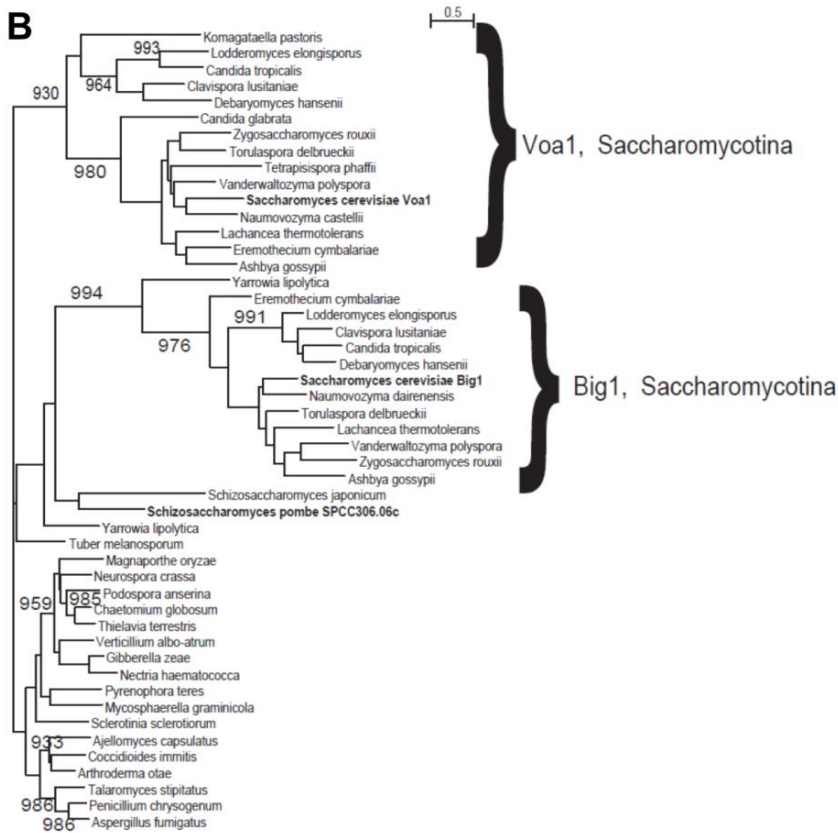

**C**

|                               |   |   |   |   |   |   |   |   |   |   |   |   |   |   |   |   |   |   |   |   |   |   |   |   |   |   |   |   |   |   |   |
|-------------------------------|---|---|---|---|---|---|---|---|---|---|---|---|---|---|---|---|---|---|---|---|---|---|---|---|---|---|---|---|---|---|---|
| H.sapiens Ac45 420-450        | S | F | F | S | P | G | I | W | M | G | L | L | T | S | L | F | M | L | F | I | F | T | Y | G | L | H | M | I | L | S | L |
| M.musculus VAS1 413-443       | G | F | F | S | P | G | I | W | M | G | L | L | T | T | L | F | M | L | F | I | F | T | Y | G | L | H | M | I | L | S | L |
| T.guttata H0Z1M8 362-392      | G | F | F | T | P | G | I | W | M | G | L | V | T | S | I | I | L | L | W | I | L | T | Y | G | I | H | M | I | M | Q | L |
| X.leavis Q9PU12 408-438       | G | F | F | S | P | G | I | W | M | G | L | I | T | T | L | L | F | V | F | I | L | T | Y | G | L | H | M | V | M | S | L |
| D.erio F1R9A7 416-446         | S | F | F | T | P | G | I | W | M | G | L | V | T | S | L | L | M | V | L | V | L | T | Y | G | L | H | M | I | M | Q | L |
| D.melanogaster Q7JR49 328-358 | G | F | V | T | P | G | I | L | M | G | L | F | V | V | A | L | L | L | V | I | M | F | V | G | V | C | W | M | D | I |   |
| C.elegans Q9TYW1 400-450      | G | T | F | S | S | G | S | W | M | G | I | V | S | A | L | V | L | I | A | G | L | M | F | G | Y | V | M | L | Q | S | V |
| S.pombe SPCC306.06c 266-296   | Q | F | F | T | P | G | L | Y | M | G | Y | L | A | L | A | V | L | V | P | T | L | F | I | S | C | R | L | L | S | I |   |
| S.cerevisiae VOA1 217-247     | S | I | W | T | E | G | L | L | M | C | L | I | V | S | A | L | L | L | F | I | L | I | V | A | L | S | W | I | S | N | L |
| D. discoideum Q557I5 251-281  | T | Y | V | T | G | P | V | L | S | A | Y | L | I | S | I | L | L | A | I | L | F | T | G | I | C | C | I | S | D | L |   |
| E.siliculosus D8LJ92 250-280  | I | K | I | T | P | D | I | L | A | G | L | L | T | L | L | L | F | L | F | I | L | V | T | G | L | G | C | V | G | D | I |
| A.thaliana AT3G13410 280-309  | K | F | K | S | - | S | L | L | E | G | I | L | V | G | I | V | F | L | L | I | L | I | S | G | L | C | C | M | A | G | I |

### **Supplementary Fig. 7. Homology prediction of Voa1 and Big1**

(a) Helical wheel projection of the 10 most strongly conserved positions in the C-terminal transmembrane helix of homologs of Ac45. The projection starts at the first amino acid “before” the transmembrane region (G1) and continues until the first amino acid after the helix (S25). Most of the conserved residues are on one side of the helix, suggesting a conserved interaction interface. Conservation was calculated with JACKHMMER and the helical wheel projection was drawn with the tool at <http://rzlab.ucr.edu/scripts/wheel/wheel.cgi>. (b) Phylogeny of the ATP6AP1/Big1/Voa1 protein family among Fungi. Species that have both Voa1 and Big1 are all part of the Saccharomycotina clade. Species that only have a single copy of that gene fall outside that of the Saccharomycotina clade, suggesting that the duplication that gave rise to Big1 and Voa1 happened early in the evolution of the Saccharomycotina. The neighbor-joining phylogeny is based on a ClustalX alignment using the identity matrix for sequence similarity and correcting for multiple substitutions. Genbank identifiers for the sequences used are indicated with the species names. (c) Alignment of the C-terminal transmembrane helix, and its flanking aminoacids of ATP6AP1 homologs among representative species of the various eukaryotic taxa. The homologs were detected with JACKHMMER. With each sequence its uniprot identifier is indicated. Full species names are: *Homo sapiens*, *Mus musculus*, *Taeniopygia guttata*, *Xenopus laevis*, *Danio rerio*, *Drosophila melanogaster*, *Caenorhabditis elegans*, *Schizosaccharomyces pombe*, *Saccharomyces cerevisiae*, *Dictyostelium discoideum*, *Ectocarpus siliculosus*, *Arabidopsis thaliana*.



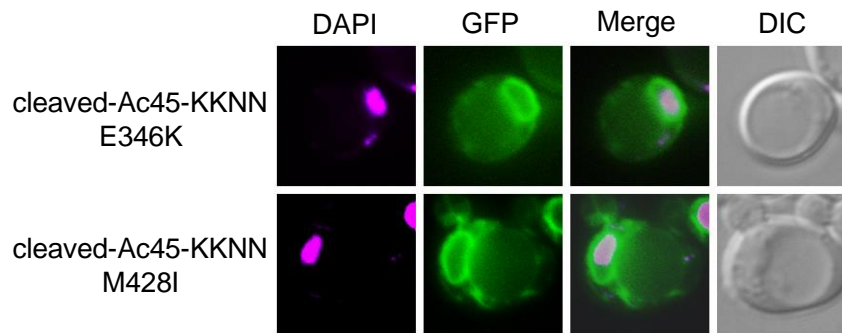

**Supplementary Fig. 8. ER localization of mutant forms of cleaved-Ac45-KKNN**

Fluorescent microscopy of live yeast cells showing DAPI stained DNA, GFP, the merged image of both, and cells viewed by differential interference contrast (DIC) to locate the vacuole as apparent indentation. The indicated proteins are N-terminally tagged with HA-GFP and expressed in *voal::H vma21QQ* yeast cells. ER localization was also observed for the cleaved-Ac45-KKNN Y313C mutant (not shown). Perinuclear GFP fluorescence indicates ER localization.

**Supplementary Table 1: Candidate variants found by exome sequencing in patient 1.1**

| Chr.                                                                                                                                                         | Genomic position [hg19] | Reference nucleotide | Variant nucleotide | Coverage | variant reads | % variation | SNP ID/ SNP state        | In-house db | Gene component | Gene    | Isoform ID   | Strand | Protein change | cDNA change | phyloP | Grantham Score |
|--------------------------------------------------------------------------------------------------------------------------------------------------------------|-------------------------|----------------------|--------------------|----------|---------------|-------------|--------------------------|-------------|----------------|---------|--------------|--------|----------------|-------------|--------|----------------|
| <b><u>Homozygous variants [sorted by phyloP]:</u></b>                                                                                                        |                         |                      |                    |          |               |             |                          |             |                |         |              |        |                |             |        |                |
| chrX                                                                                                                                                         | 153664108               | G                    | A                  | 65       | 65            | 100         |                          | 0           | Exon           | ATP6AP1 | NM_001183    | +      | p.Met428Ile    | c.1284G>A   | 5.11   | 10             |
| <b><u>Compound heterozygous variants [sorted by phyloP]:</u></b>                                                                                             |                         |                      |                    |          |               |             |                          |             |                |         |              |        |                |             |        |                |
| chr1                                                                                                                                                         | 152732227               | C                    | T                  | 20       | 5             | 25          |                          | 0           | Exon           | KPRP    | NM_001025231 | +      | p.Gln55*       | c.163C>T    | 3.44   | 1000           |
| chr1                                                                                                                                                         | 152733472               | C                    | T                  | 195      | 94            | 48          | rs141557248/<br>Same SNP | 6           | Exon           | KPRP    | NM_001025231 | +      | p.Pro470Ser    | c.1408C>T   | 0.75   | 74             |
| <p><b>Chr. = Chromosome; SNP ID = dbSNP137 identifier; In-house db = In-house database count in &gt;1300 exomes; PhyloP = 46 vertebrate PhyloP score</b></p> |                         |                      |                    |          |               |             |                          |             |                |         |              |        |                |             |        |                |

**Supplementary Table 2: Quantification of Transferrin and ApoCIII isofocusing profiles**

| Patient ID    | T0    | T1  | T2      | T3       | T4        | T5        | T6      | Age              | ApoCIII-0 | ApoCIII-1   | ApoCIII-2   |
|---------------|-------|-----|---------|----------|-----------|-----------|---------|------------------|-----------|-------------|-------------|
| 1.1           | 1.2   | 2.7 | 11.1    | 27.4     | 42.3      | 11.5      | 3.8     | 9 yr             | 5.7       | 82.8        | 11.5        |
| 1.2           | 2.0   | 3.6 | 13.6    | 26.8     | 38.0      | 13.2      | 2.8     | 8 yr             | 5.6       | 77.8        | 16.6        |
| 1.3           | 2.0   | 3.2 | 11.1    | 22.7     | 40.1      | 17.4      | 3.5     | 29 yr            | 2.1       | 75.6        | 22.3        |
| 2             | 0.0   | 3.1 | 8.0     | 25.5     | 47.3      | 13.3      | 2.9     | 8 yr             | 6.6       | 77.7        | 15.7        |
| 3.1           | 2.5   | 6.4 | 17.9    | 23.5     | 32.0      | 14.3      | 3.4     | 3 yr             | 4.0       | 88.2        | 7.8         |
| 3.2           | 4.8   | 4.8 | 12.1    | 20.1     | 35.5      | 17.7      | 4.4     | 1 yr             | 5.8       | 61.4        | 32.8        |
| 4.1           | 1.3   | 5.3 | 14.7    | 27.1     | 40.8      | 9.5       | 1.4     | 21 yr            | 5.5       | 83.8        | 10.7        |
| 4.2           | 1.5   | 4.1 | 12.3    | 26.3     | 45.3      | 9.2       | 1.4     | 16 yr            | 6.9       | 72.7        | 20.4        |
| 5.1           | 1.7   | 2.5 | 8.1     | 16.2     | 47.0      | 20.7      | 3.8     | 1 yr             | 4.6       | 38.2        | 57.2        |
| 5.2           | 1.7   | 4.0 | 11.1    | 19.4     | 47.6      | 13.5      | 2.7     | 3 mo             | 5.6       | 83.9        | 10.5        |
| 6             | 1.0   | 1.7 | 9.4     | 26.0     | 46.1      | 13.6      | 2.3     | 2 yr             | 4.6       | 78.5        | 16.9        |
| Control range | 0-3.2 | 0-5 | 3.3-7.6 | 4.9-10.6 | 47.3-62.7 | 18.7-31.5 | 3.2-7.8 | <b>0-1 yr</b>    | 0.2 - 4.5 | 42.7 - 69.8 | 26.2 - 56.7 |
|               |       |     |         |          |           |           |         | <b>1-18 yr</b>   | 1.4 - 9.5 | 48.5 - 75.2 | 21.0 - 45.8 |
|               |       |     |         |          |           |           |         | <b>&gt;18 yr</b> | 1.8 - 7.6 | 47.4 - 73.6 | 20.2 - 46.5 |

**Supplementary Table 3: Mass and abundance of transferrin isoforms**

|                | Peak number | 1        | 2        | 3        | 4        | 5        | 6        | 7        |
|----------------|-------------|----------|----------|----------|----------|----------|----------|----------|
|                | Structure   |          |          |          |          |          |          |          |
| <b>Control</b> | Mass (amu)  | n.d.     | n.d.     | n.d.     | n.d.     | 79267.23 | 79559.24 | 80216    |
|                | Height (%)  | n.d.     | n.d.     | n.d.     | n.d.     | 2.2      | 100.0    | 16.5     |
| <b>1.1</b>     | Mass (amu)  | 78643.79 | 78807.33 | 78968.79 | 79100.03 | 79260.86 | 79552.65 | 80208.94 |
|                | Height (%)  | 0.7      | 3.2      | 5.7      | 5.7      | 34.7     | 100.0    | 7.3      |
| <b>1.2</b>     | Mass (amu)  | 78648.98 | 78811.2  | 78973.22 | 79104.42 | 79264.46 | 79555.96 | 80212.26 |
|                | Height (%)  | 1.7      | 6.1      | 10.9     | 7.2      | 47.2     | 100.0    | 11.5     |
| <b>1.3</b>     | Mass (amu)  | 78647.1  | 78810.31 | 78972.31 | 79104.89 | 79264.11 | 79555.72 | 80212.88 |
|                | Height (%)  | 0.5      | 3.0      | 6.5      | 4.6      | 34.8     | 100.0    | 8.7      |
| <b>2</b>       | Mass (amu)  | n.d.     | 78804.91 | 78967.95 | 79097.46 | 79259.24 | 79551.79 | 80208.5  |
|                | Height (%)  | n.d.     | 1.4      | 4.3      | 2.2      | 31.1     | 100.0    | 10.2     |
| <b>3.1</b>     | Mass (amu)  | 78643.74 | 78806.3  | 78968.66 | 79100.26 | 79260.11 | 79551.68 | 80208.45 |
|                | Height (%)  | 1.2      | 4.9      | 12.5     | 4.6      | 46.8     | 100.0    | 12.9     |
| <b>3.2</b>     | Mass (amu)  | 78649.94 | 78812.32 | 78974.63 | 79105.89 | 79265.88 | 79557.39 | 80213.93 |
|                | Height (%)  | 1.0      | 3.7      | 9.8      | 3.6      | 42.0     | 100.0    | 11.9     |
| <b>4.1</b>     | Mass (amu)  | 78645.54 | 78807    | 78968.94 | 79101.03 | 79260.79 | 79552.31 | 80209.09 |
|                | Height (%)  | 3.2      | 7.0      | 9.5      | 7.4      | 41.0     | 100.0    | 7.0      |
| <b>4.2</b>     | Mass (amu)  | 78645.22 | 78807.07 | 78968.89 | 79102.68 | 79260.8  | 79552.5  | 80209.42 |
|                | Height (%)  | 1.7      | 4.1      | 6.9      | 4.6      | 33.3     | 100.0    | 5.8      |
| <b>5.1</b>     | Mass (amu)  | n.d.     | n.d.     | 78965.18 | n.d.     | 79255.57 | 79547.74 | 80203.7  |
|                | Height (%)  | n.d.     | n.d.     | 0.7      | n.d.     | 9.2      | 100.0    | 11.7     |
| <b>5.2</b>     | Mass (amu)  | 78639.89 | 78801.66 | 78964.17 | 79093.44 | 79255.38 | 79547.01 | 80203.34 |
|                | Height (%)  | 1.8      | 3.5      | 3.5      | 6.2      | 22.7     | 100.0    | 17.3     |
| <b>6</b>       | Mass (amu)  | 78649.02 | 78812.75 | 78974.62 | 79107.86 | 79265.76 | 79557.18 | 80213.68 |
|                | Height (%)  | 0.1      | 1.3      | 4.8      | 2.2      | 32.6     | 100.0    | 13.0     |



**Supplementary Table 4: Primer sequences for PCR, qPCR, and sequence analysis of *ATP6AP1***

| <b>Region of ATP6AP1</b>    | <b>Forward 5'-&gt;3'</b>                       | <b>Reverse 5'-&gt;3'</b>                       |
|-----------------------------|------------------------------------------------|------------------------------------------------|
| <b>Primers PCR</b>          |                                                |                                                |
| Exon 1                      | tgtaaacgacggccagtATGCACTTGGTCC<br>AATTACCTGCG  | caggaacagctatgaccAGCTGCAAGTCGC<br>TGGTGATGTGGC |
| Exon 2                      | tgtaaacgacggccagtTGCCGGTGTTTTT<br>GTCGT        | caggaacagctatgaccTGGGACAAGGTCA<br>CTGAAGC      |
| Exon 3                      | tgtaaacgacggccagtACTTTGCTGGCCC<br>TGAGAAT      | caggaacagctatgaccGGGATGGTTGACC<br>CAGAAGA      |
| Exon 4                      | tgtaaacgacggccagtGGTATGGCTTGCC<br>AGAGGA       | caggaacagctatgaccTTCTGGAAGGGCT<br>GTGAGG       |
| Exon 5                      | tgtaaacgacggccagtGGGCACTGAGGT<br>AAGAGTGT      | caggaacagctatgaccACTGCAGGCCAGC<br>TCTCTCT      |
| Exon 6                      | tgtaaacgacggccagtAAGCAGACAGTG<br>GGGAGTGTT     | caggaacagctatgaccCCACCTCCAAGCA<br>GACTCAC      |
| Exon 7                      | tgtaaacgacggccagtCTGGCTGATGGG<br>ACTTTGAG      | caggaacagctatgaccATGACACCTCCTA<br>CATCCTCAC    |
| Exon 8                      | tgtaaacgacggccagtAAGGACCCAAGG<br>CAGCTTAGGTAGG | caggaacagctatgaccTACATGCCCAAGC<br>CCAAG        |
| Exon 9                      | tgtaaacgacggccagtGTCAAGTGGGGA<br>CACTGCTT      | caggaacagctatgaccCAGCAAGAAGTGG<br>GACAGG       |
| Exon 10                     | tgtaaacgacggccagtTTGAGAGTCCTGT<br>CCCTGC       | caggaacagctatgaccCACCGTCCCACCC<br>TCAAC        |
| <b>Primers sequence PCR</b> |                                                |                                                |
| <i>M13 tail</i>             | tgtaaacgacggccagt                              | caggaacagctatgacc                              |
| <b>Primers qPCR</b>         |                                                |                                                |
| <i>ATP6AP1</i>              | TCAACCTGACTGGCTCCTTC                           | GAGGCGCTCCATGGTAAAC                            |
| <i>ATP6AP1</i>              | CCCAGCATCTACTCCTTCCA                           | GGAGAAGTCTCCCCCATTA                            |
| <i>PPIB</i>                 | CGGAAAGACTGTTCCAAAAAC                          | GATTACACGATGGAATTTGCTG                         |
| <i>GUSB</i>                 | AGAGTGGTGCTGAGGATTGG                           | CCCTCATGCTCTAGCGTGTC                           |

**Supplementary Table 5: Plasmids used for Yeast complementation studies**

| Plasmid      | Description                                                    | Reference                 |
|--------------|----------------------------------------------------------------|---------------------------|
| pRS316       | Yeast shuttle vector, <i>CEN ARS URA3 Amp<sup>r</sup></i>      | Sikorski and Hieter, 1989 |
| pMR072       | pRS316 <i>HA-VOA1</i>                                          | Ryan et al. 2008          |
| pMR0712      | pRS316 <i>HA-voa1QQ</i>                                        | Ryan et al. 2008          |
| pMR092       | pRS316 <i>HA-GFP-VOA1</i>                                      | This study                |
| pMR1312      | pRS316 <i>HA-GFP-voa1QQ</i>                                    | This study                |
| pMR124       | pRS316 <i>VOA1(1-25)-HA-VOA1(26-217)-ATP6API(421-470)-KKNN</i> | This study                |
| pMR1210      | pRS316 <i>VOA1(1-25)-HA-ATP6API(43-470)-KKNN</i>               | This study                |
| pMR1211      | pRS316 <i>VOA1(1-25)-HA-ATP6API(43-470)</i>                    | This study                |
| pMR1213      | pRS316 <i>VOA1(1-25)-HA-ATP6API(251-470)-KKNN</i>              | This study                |
| pMR1213Y313C | pRS316 <i>VOA1(1-25)-HA-ATP6API(251-470)-KKNN Y313C</i>        | This study                |
| pMR1213E346K | pRS316 <i>VOA1(1-25)-HA-ATP6API(251-470)-KKNN E346K</i>        | This study                |
| pMR1213M428I | pRS316 <i>VOA1(1-25)-HA-ATP6API(251-470)-KKNN M428I</i>        | This study                |
| pMR1214      | pRS316 <i>VOA1(1-25)-HA-ATP6API(251-470)</i>                   | This study                |
| pMR1303      | pRS316 <i>VOA1(1-25)-HA-GFP-ATP6API(251-470)-KKNN</i>          | This study                |
| pMR1303E346K | pRS316 <i>VOA1(1-25)-HA-GFP-ATP6API(251-470)-KKNN E346K</i>    | This study                |
| pMR1303M428I | pRS316 <i>VOA1(1-25)-HA-GFP-ATP6API(251-470)-KKNN M428I</i>    | This study                |
| pMR1304      | pRS316 <i>VOA1(1-25)-HA-GFP-ATP6API(251-470)</i>               | This study                |

Numbers in parentheses refer to amino acid residues

## Supplementary References

- [1] Sikorski, R. S. and P. Hieter (1989). "A system of shuttle vectors and yeast host strains designed for efficient manipulation of DNA in *Saccharomyces cerevisiae*." Genetics **122**(1): 19-27.
- [2] Ryan, M., L. A. Graham, et al. (2008). "Voa1p functions in V-ATPase assembly in the yeast endoplasmic reticulum." Mol Biol Cell **19**(12): 5131-5142.
